# Supplementary material for: Independent Association Between Obstructive Sleep Apnea Severity and Glycated Hemoglobin in Adults Without Diabetes
Source: Oxford University Press journal article supplement (doi:10.2337/dc11-2538), 2012-06-12
Supplement: dc112538supplementarydata.pdf [file dc112538supplementarydata.pdf]

SUPPLEMENTARY DATA

**Supplementary Table 1.** Seven sites collaborating in the *Institut de Recherche en Santé Respiratoire des Pays de la Loire [IRSR] sleep cohort*

- Site 1: Department of Respiratory Diseases, Angers University hospital, France
- Site 2: Department of Respiratory Diseases, Nantes University hospital, France
- Site 3: Department of Respiratory Diseases, Cholet hospital, France
- Site 4: Department of Respiratory Diseases, Nouvelles Cliniques Nantaises, France
- Site 5: Department of Respiratory Diseases, Pôle santé des Olonnes, Olonnes sur Mer, France
- Site 6: Department of Respiratory Diseases, La Roche sur Yon hospital, France
- Site 7: Department of Respiratory Diseases, Le Mans hospital, France

**Supplementary Table 2.** Multiple linear regression models for glycated hemoglobin

|                                     | Model 1 |         | Model 2 |         | Model 3 |         | Model 4 |         |
|-------------------------------------|---------|---------|---------|---------|---------|---------|---------|---------|
|                                     | β coef. | P value |
| Age (year)                          | 0.0051  | <0.0001 | 0.0050  | <0.0001 | 0.0057  | <0.0001 | 0.0052  | <0.0001 |
| Gender (ref.=F)                     | 0.0012  | 0.96    | 0.0019  | 0.93    | 0.0010  | 0.97    | 0.0112  | 0.61    |
| Smoking habits (ref.=non-smoker)    | 0.0529  | 0.03    | 0.0565  | 0.02    | 0.0616  | 0.03    | 0.0495  | 0.05    |
| BMI (kg/m <sup>2</sup> )            | 0.0123  | 0.0002  | 0.0128  | 0.0001  | 0.0143  | 0.0003  | 0.0123  | 0.0004  |
| WC (cm)                             | -0.0001 | 0.91    | -0.0004 | 0.76    | -0.0014 | 0.35    | -0.0001 | 0.97    |
| ESS                                 | 0.0015  | 0.41    | -0.0013 | 0.49    | -0.0016 | 0.43    | -0.0019 | 0.33    |
| Depression † (ref.=none)            | 0.0135  | 0.52    | -0.0156 | 0.46    | -0.0144 | 0.85    | -0.0167 | 0.43    |
| CV morbidity‡ (ref=none)            | 0.0270  | 0.19    | 0.0266  | 0.20    | 0.0115  | 0.61    | 0.0256  | 0.23    |
| Insomnia (ref=yes)                  | -0.0118 | 0.53    | -0.0154 | 0.41    | -0.0075 | 0.71    | -0.0167 | 0.38    |
| TST# (ref=<300 minutes)             | -0.0214 | 0.23    | -0.0268 | 0.14    | -0.0167 | 0.14    | -0.0182 | 0.32    |
| AHI                                 | 0.0013  | 0.003   | -       | -       | -       | -       | -       | -       |
| Mean SaO <sub>2</sub>               | -       | -       | -0.0116 | 0.02    | -       | -       | -       | -       |
| 3% ODI                              | -       | -       | -       | -       | 0.0014  | 0.008   | -       | -       |
| Time with SaO <sub>2</sub> <90% (%) | -       | -       | -       | -       | -       | -       | 0.0017  | 0.007   |

The influence of obstructive sleep apnea severity was analyzed according to apnea-hypopnea index (AHI) (model 1), mean nocturnal oxygen saturation (SaO<sub>2</sub>) (model 2), 3% oxygen desaturation index (ODI) (model 3), and time with SaO<sub>2</sub><90% (model 4)

Coef., coefficient; ref., reference; F, female; BMI, body mass index; WC, waist circumference; ESS, Epworth Sleepiness Scale(1); CV, cardiovascular; TST, total sleep time (Since TST was available for only 563 patients, this variable was entered in the model according to discrete modalities (<300 minutes, ≥ 300 minutes, or unavailable).

† Depression was defined by ≥ 7 positive items on the 13-item version of the Pichot depression scale(2) or self-reported use of antidepressant medication

‡ Patients were classified as having CV morbidity if they reported at least one of the following: known and treated hypertension, ischemic heart disease, cardiac arrhythmia, congestive heart failure and stroke

## SUPPLEMENTARY DATA

### References

1. Johns MW. A new method for measuring daytime sleepiness: the Epworth sleepiness scale. *Sleep* 1991; 14:540-545.
2. de Bonis M, Lebeaux MO, de Boeck P, Simon M, Pichot P. Measuring the severity of depression through a self-report inventory. A comparison of logistic, factorial and implicit models. *J Affect Disord* 1991; 22:55-64.
